# Supplementary material for: Identification of β-Secretase (BACE1) Substrates Using Quantitative Proteomics
Source: PLoS One. 2009 Dec 29;4(12):e8477. doi: 10.1371/journal.pone.0008477 (PMC2793532; doi:10.1371/journal.pone.0008477)
Supplement: Table S1 — Expanded information on putative β-secretase substrates. (0.05 MB XLS) [file pone.0008477.s001.xls]

## Sheet: Table S1
ID	Annotation	Peptide	IPI	Cell Line	PSMs	Ratio(BACE/total)	Topology
APLP2	ISOFORM 1 OF AMYLOID-LIKE PROTEIN 2 PRECURSOR. [MASS=86956]	RMALENYLAALQSD	IPI00031030	HEK	57	0.981897	type I
APLP2	ISOFORM 1 OF AMYLOID-LIKE PROTEIN 2 PRECURSOR. [MASS=86956]	HYQHVLAVD	IPI00031030	HEK	45	0.976614	type I
APLP2	ISOFORM 1 OF AMYLOID-LIKE PROTEIN 2 PRECURSOR. [MASS=86956]	VDENMVIDETL	IPI00031030	HEK	35	0.9635	type I
APLP2	ISOFORM 1 OF AMYLOID-LIKE PROTEIN 2 PRECURSOR. [MASS=86956]	LNMHVNIQTGKWEPDPTGTK	IPI00031030	HEK	12	0.991901	type I
APLP2	ISOFORM 1 OF AMYLOID-LIKE PROTEIN 2 PRECURSOR. [MASS=86956]	AERQTLIQHFQAMVK	IPI00031030	HeLa	7	0.962664	type I
APLP2	ISOFORM 1 OF AMYLOID-LIKE PROTEIN 2 PRECURSOR. [MASS=86956]	GSGVGEQDGGLIGAEEK	IPI00031030	HEK	5	0.815437	type I
APLP2	ISOFORM 1 OF AMYLOID-LIKE PROTEIN 2 PRECURSOR. [MASS=86956]	KGSGVGEQDGGLIGAEEK	IPI00031030	HeLa	2	0.982358	type I
APLP2	ISOFORM 1 OF AMYLOID-LIKE PROTEIN 2 PRECURSOR. [MASS=86956]	LNMHVNIQTGKWEPDPTGTK	IPI00031030	HeLa	1	1	type I
APLP2	ISOFORM 1 OF AMYLOID-LIKE PROTEIN 2 PRECURSOR. [MASS=86956]	VGGLEEERESVGPLR	IPI00031030	HEK	1	0.950183	type I
APP	ISOFORM APP770 OF AMYLOID BETA A4 PROTEIN PRECURSOR (FRAGMENT). [MASS=86943]	MDAEFRHDSGY	IPI00006608	HEK	59	0.957193	type I
APP	ISOFORM APP770 OF AMYLOID BETA A4 PROTEIN PRECURSOR (FRAGMENT). [MASS=86943]	AMISRWYFDVTEGK	IPI00006608	HeLa	50	0.934115	type I
APP	ISOFORM APP770 OF AMYLOID BETA A4 PROTEIN PRECURSOR (FRAGMENT). [MASS=86943]	LEVPTDGNAGLLAEPQIAMFCGR	IPI00006608	HEK	30	0.885643	type I
APP	ISOFORM APP770 OF AMYLOID BETA A4 PROTEIN PRECURSOR (FRAGMENT). [MASS=86943]	LEVPTDGNAGLLAEPQIAMFCGR	IPI00006608	HeLa	18	0.824411	type I
APP	ISOFORM APP770 OF AMYLOID BETA A4 PROTEIN PRECURSOR (FRAGMENT). [MASS=86943]	HVFNMLK	IPI00006608	HEK	8	0.974928	type I
APP	ISOFORM APP770 OF AMYLOID BETA A4 PROTEIN PRECURSOR (FRAGMENT). [MASS=86943]	LEVPTDGNAGLLAEPQIAMFCGR	IPI00006608	HEK	2	0.661555	type I
APP	ISOFORM APP770 OF AMYLOID BETA A4 PROTEIN PRECURSOR (FRAGMENT). [MASS=86943]	STNLHDYGMLLPCGIDKFR	IPI00006608	HEK	1	0.96216	type I
APP	ISOFORM APP770 OF AMYLOID BETA A4 PROTEIN PRECURSOR (FRAGMENT). [MASS=86943]	LALENYITALQAVPPRPR	IPI00006608	HEK	1	0.939134	type I
APLP1	AMYLOID-LIKE PROTEIN 1 PRECURSOR. [MASS=72176]	GFPFHSSEIQ	IPI00020012	HEK	6	0.894739	type I
APLP1	AMYLOID-LIKE PROTEIN 1 PRECURSOR. [MASS=72176]	VLLALRR	IPI00020012	HEK	2	0.837423	type I
APLP1	AMYLOID-LIKE PROTEIN 1 PRECURSOR. [MASS=72176]	VLEYCR	IPI00020012	HeLa	1	0.898323	type I
APLP1	AMYLOID-LIKE PROTEIN 1 PRECURSOR. [MASS=72176]	GFPFHSSEIQR	IPI00020012	HeLa	1	0.948986	type I
IGF2R	CATION-INDEPENDENT MANNOSE-6-PHOSPHATE RECEPTOR PRECURSOR. [MASS=274276]	VVSSCQEKREPQGFHK	IPI00289819	HEK	104	0.897957	type I
IGF2R	CATION-INDEPENDENT MANNOSE-6-PHOSPHATE RECEPTOR PRECURSOR. [MASS=274276]	LTYENGLLK	IPI00289819	HeLa	26	0.878379	type I
IGF2R	CATION-INDEPENDENT MANNOSE-6-PHOSPHATE RECEPTOR PRECURSOR. [MASS=274276]	SYEECIIESR	IPI00289819	HEK	3	0.906601	type I
IGF2R	CATION-INDEPENDENT MANNOSE-6-PHOSPHATE RECEPTOR PRECURSOR. [MASS=274276]	TSGEGGCFYEFEWHTAAACVLSK	IPI00289819	HEK	2	0.820666	type I
EPHA2	EPHRIN TYPE-A RECEPTOR 2 PRECURSOR. [MASS=108254]	ETFNLYYAESDLDYGTNFQK	IPI00021267	HEK	2	0.944735	type I
EPHA4	EPHRIN TYPE-A RECEPTOR 4 PRECURSOR. [MASS=109860]	VYIEIK	IPI00008318	HEK	5	0.931349	type I
EPHA7	ISOFORM 1 OF EPHRIN TYPE-A RECEPTOR 7 PRECURSOR. [MASS=112083]	AGYQQKGDTCEPCGRGFYK	IPI00016645	HEK	9	0.854111	type I
EPHA7	ISOFORM 1 OF EPHRIN TYPE-A RECEPTOR 7 PRECURSOR. [MASS=112083]	STSASINNLKPGTVYVFQIR	IPI00016645	HEK	1	1	type I
EPHB4V1	RECEPTOR PROTEIN TYROSINE KINASE VARIANT EPHB4V1. [MASS=102558]	LEETLLNTKLETADLK	IPI00186826	HEK	3	0.962839	type I
EPHB4V1	RECEPTOR PROTEIN TYROSINE KINASE VARIANT EPHB4V1. [MASS=102558]	KRPGAEATGKVNVK	IPI00186826	HEK	3	0.936987	type I
EPHB4V1	RECEPTOR PROTEIN TYROSINE KINASE VARIANT EPHB4V1. [MASS=102558]	DLVEPWVVVR	IPI00186826	HeLa	1	0.942187	type I
HGF (c-MET)	ISOFORM 1 OF HEPATOCYTE GROWTH FACTOR RECEPTOR PRECURSOR. [MASS=155527]	SAMCAFPIK	IPI00029273	HEK	5	0.878677	type I
HGF (c-MET)	ISOFORM 1 OF HEPATOCYTE GROWTH FACTOR RECEPTOR PRECURSOR. [MASS=155527]	HFQSCSQCLSAPPFVQCGWCHDK	IPI00029273	HeLa	5	0.683921	type I
HGF (c-MET)	ISOFORM 1 OF HEPATOCYTE GROWTH FACTOR RECEPTOR PRECURSOR. [MASS=155527]	ETSIFSYREDPIVYEIHPTK	IPI00029273	HeLa	3	0.663193	type I
IL6R beta	ISOFORM 1 OF INTERLEUKIN-6 RECEPTOR BETA CHAIN PRECURSOR. [MASS=103523]	EDGKGYWSDWSEEASGITYEDRPSK	IPI00297124	HEK	6	0.97202	type I
IL6R beta	ISOFORM 1 OF INTERLEUKIN-6 RECEPTOR BETA CHAIN PRECURSOR. [MASS=103523]	TVQLVWK	IPI00297124	HEK	1	1	type I
IL6R beta	ISOFORM 1 OF INTERLEUKIN-6 RECEPTOR BETA CHAIN PRECURSOR. [MASS=103523]	APCITDWQQEDGTVHR	IPI00297124	HeLa	1	0.974125	type I
LRIG1/2/3	ISOFORM 1 OF LEUCINE-RICH REPEATS AND IMMUNOGLOBULIN-LIKE DOMAINS PROTEIN 1/2/3	DGGTDFPAAR	IPI00000775	HEK	1	0.920573	type I
LRIG1	ISOFORM 1 OF LEUCINE-RICH REPEATS AND IMMUNOGLOBULIN-LIKE DOMAINS PROTEIN 1 PRECURSOR. [MASS=119053]	VLDLDHNEISGTIEDTSGAFSGLDSLSK	IPI00000775	HEK	1	0.774232	type I
LRIG3	ISOFORM 1 OF LEUCINE-RICH REPEATS AND IMMUNOGLOBULIN-LIKE DOMAINS PROTEIN 3 PRECURSOR. [MASS=123434]	LECAAVGHPAPQIAWQK	IPI00184265	HEK	1	1	type I
NCAM1	ISOFORM 1 OF NEURONAL CELL ADHESION MOLECULE PRECURSOR. [MASS=144074]	FIIEYEDAMHKPGLWHHQTEVSGTQTTAQLK	IPI00333776	HEK	5	0.839369	type I
NCAM1	ISOFORM N-CAM 120 OF NEURAL CELL ADHESION MOLECULE 1, 120 KDA ISOFORM PRECURSOR. [MASS=83770]	KVDKNDEAEYICIAENK	IPI00220737	HEK	4	0.931814	type I
NCAM1	ISOFORM N-CAM 120 OF NEURAL CELL ADHESION MOLECULE 1, 120 KDA ISOFORM PRECURSOR. [MASS=83770]	DGEQIEQEEDDEKYIFSDDSSQLTIK	IPI00220737	HEK	1	0.981443	type I
NCAM1	NEURAL CELL ADHESION MOLECULE 1, 140 KDA ISOFORM PRECURSOR. [MASS=93361]	TQPVQGEPSAPK	IPI00435020	HEK	1	0.787304	type I
NCAML1	ISOFORM 1 OF NEURAL CELL ADHESION MOLECULE L1 PRECURSOR. [MASS=140003]	VGEEDDGEYRCLAENSLGSAR	IPI00027087	HeLa	5	0.728639	type I
NCAML1	ISOFORM 1 OF NEURAL CELL ADHESION MOLECULE L1 PRECURSOR. [MASS=140003]	LGTAMSHEIR	IPI00027087	HeLa	2	0.836034	type I
ROBO1	ISOFORM 1 OF ROUNDABOUT HOMOLOG 1 PRECURSOR. [MASS=180930]	DGSPLDDKDER	IPI00219798	HEK	25	0.95196	type I
ROBO1	ISOFORM 1 OF ROUNDABOUT HOMOLOG 1 PRECURSOR. [MASS=180930]	AYLEVTDVIADRPPPVIR	IPI00219798	HEK	1	0.806368	type I
ROBO1	ISOFORM 1 OF ROUNDABOUT HOMOLOG 1 PRECURSOR. [MASS=180930]	TVTFQCEATGNPQPAIFWRR	IPI00219798	HeLa	1	0.674436	type I
ROBO2A	ROBO2 ISOFORM A. [MASS=153120]	NYDLSDLPGPPSKPQVTDVTK	IPI00385980	HEK	1	1	type I
SDK1	ISOFORM 3 OF PROTEIN SIDEKICK-1 PRECURSOR. [MASS=242594]	YFTMQVR	IPI00383951	HEK	14	0.880973	type I
SDK2	ISOFORM 1 OF PROTEIN SIDEKICK-2 PRECURSOR. [MASS=239121]	LVVIALVGLIFILLLVFVLIIR	IPI00292043	HEK	7	0.826023	type I
SDK2	ISOFORM 1 OF PROTEIN SIDEKICK-2 PRECURSOR. [MASS=239121]	LVVIALVGLIFILLLVFVLIIR	IPI00292043	HeLa	1	1	type I
SEMA4B	SEMAPHORIN 4B PRECURSOR. [MASS=92766]	ETQQWYTVTHPVPTPRPGACITNSAR	IPI00419724	HEK	6	0.826079	type I
SEMA4B	SEMAPHORIN 4B PRECURSOR. [MASS=92766]	DTLFYGVFTSQWHR	IPI00419724	HeLa	1	0.75467	type I
SEMA4C	SEMAPHORIN-4C PRECURSOR. [MASS=92623]	AEVWWNLVPR	IPI00073763	HEK	7	0.884896	type I
SEMA4C	SEMAPHORIN-4C PRECURSOR. [MASS=92623]	HAGAYHCFSEEQGAR	IPI00073763	HEK	1	0.962992	type I
SEMA6A	ISOFORM 2 OF SEMAPHORIN-6A PRECURSOR. [MASS=116310]	PGCCAGSSSLER	IPI00002211	HEK	1	0.697175	type I
SEMA6D	ISOFORM 2 OF SEMAPHORIN-6D PRECURSOR. [MASS=111730]	TSIDFPDETLSFIK	IPI00170551	HEK	1	0.916044	type I
SORL1	SORTILIN-RELATED RECEPTOR PRECURSOR. [MASS=248441]	SSDVYVSYDYGK	IPI00022608	HEK	2	0.70693	type I
SORT1	SORTILIN PRECURSOR. [MASS=92068]	NCEEKDYTIWLAHSTDPEDYEDGCILGYK	IPI00217882	HEK	8	0.837852	type I
PVR	ISOFORM BETA OF POLIOVIRUS RECEPTOR PRECURSOR. [MASS=40125]	AKPQNTAEVQK	IPI00219425	HEK	6	0.712672	type I
PVR	ISOFORM BETA OF POLIOVIRUS RECEPTOR PRECURSOR. [MASS=40125]	VLAKPQNTAEVQK	IPI00219425	HeLa	3	0.753236	type I
PVR	ISOFORM BETA OF POLIOVIRUS RECEPTOR PRECURSOR. [MASS=40125]	HGESGSMAVFHQTQGPSYSESKRLEFVAAR	IPI00219425	HEK	2	0.725961	type I
PCDH21	PROTOCADHERIN 21 PRECURSOR. [MASS=93595]	LLAVEVNTPEK	IPI00040730	HEK	3	0.715901	type I
PCDH7	ISOFORM A OF PROTOCADHERIN-7 PRECURSOR. [MASS=116105]	ATVVLNIKDENDNVPSIEIRK	IPI00001893	HEK	10	0.932053	type I
PCDH7	ISOFORM A OF PROTOCADHERIN-7 PRECURSOR. [MASS=116105]	SVYEADLAENSAPGTPILQLR	IPI00001893	HEK	4	0.843216	type I
PCDHGA11	ISOFORM 2 OF PROTOCADHERIN GAMMA A11 PRECURSOR. [MASS=91608]	VVVLDVNDHIPMFTQSVYR	IPI00012549	HEK	2	0.902453	type I
PCDHGA5	ISOFORM 1 OF PROTOCADHERIN GAMMA A5 PRECURSOR. [MASS=100935]	VVAVDKDSGQNAWLSYR	IPI00003885	HEK	1	0.988896	type I
PCDHGA8	ISOFORM 1 OF PROTOCADHERIN GAMMA A8 PRECURSOR. [MASS=101480]	SGSLITAGR	IPI00012543	HEK	1	0.952178	type I
PCDHGC3	ISOFORM 1 OF PROTOCADHERIN GAMMA C3 PRECURSOR. [MASS=101077]	VLEDAPSGTR	IPI00001872	HEK	1	0.831285	type I
PCDH21	PROTOCADHERIN 21 PRECURSOR. [MASS=93595]	VHAVDRDTGSGGSVTYFLQNLHSPFAVDR	IPI00040730	HEK	7	0.8104	type I
CBPD	CARBOXYPEPTIDASE D PRECURSOR. [MASS=152915]	IEWIRR	IPI00027078	HEK	67	0.952455	type I
CBPD	CARBOXYPEPTIDASE D PRECURSOR. [MASS=152915]	NKFVLSGNLHGGSVVASYPFDDSPEHKATGIYSK	IPI00027078	HEK	23	0.815479	type I
CBPD	CARBOXYPEPTIDASE D PRECURSOR. [MASS=152915]	FVLSGNLHGGSVVASYPFDDSPEHK	IPI00027078	HEK	1	0.844345	type I
CD276	ISOFORM 1 OF CD276 ANTIGEN PRECURSOR. [MASS=57235]	SPTGAVEVQVPEDPVVALVGTDATLR	IPI00410488	HEK	2	0.720974	type I
CD276	ISOFORM 2 OF CD276 ANTIGEN PRECURSOR. [MASS=33791]	VADEGSFTCFVSIR	IPI00019275	HEK	1	0.678434	type I
LRP11	ISOFORM 1 OF LOW-DENSITY LIPOPROTEIN RECEPTOR-RELATED PROTEIN 11 PRECURSOR. [MASS=53311]	GSGGYSAMPDAIIR	IPI00045841	HEK	6	0.960462	type I
LRP11	ISOFORM 1 OF LOW-DENSITY LIPOPROTEIN RECEPTOR-RELATED PROTEIN 11 PRECURSOR. [MASS=53311]	QLQQERPQEELELELR	IPI00045841	HeLa	2	0.823453	type I
LRP11	ISOFORM 1 OF LOW-DENSITY LIPOPROTEIN RECEPTOR-RELATED PROTEIN 11 PRECURSOR. [MASS=53311]	FALHSGYSSYSLSR	IPI00045841	HEK	1	0.954467	type I
LRP4	LOW-DENSITY LIPOPROTEIN RECEPTOR-RELATED PROTEIN 4 PRECURSOR. [MASS=215965]	TVLIWENLDRPR	IPI00306851	HEK	7	0.886974	type I
PAM	ISOFORM 1 OF PEPTIDYL-GLYCINE ALPHA-AMIDATING MONOOXYGENASE PRECURSOR. [MASS=108516]	KAGIEVQEIKEAEAVVETK	IPI00177543	HEK	11	0.773847	type I
PAM	ISOFORM 1 OF PEPTIDYL-GLYCINE ALPHA-AMIDATING MONOOXYGENASE PRECURSOR. [MASS=108516]	FTLTEKLEHR	IPI00177543	HEK	5	0.73269	type I
PAM	PEPTIDYLGLYCINE ALPHA-AMIDATING MONOOXYGENASE. [MASS=15408]	GDHVWDGNSFDSK	IPI00040158	HEK	3	0.707993	type I
PODXL	PODOCALYXIN-LIKE PROTEIN 1 PRECURSOR. [MASS=55596]	ATFNPAQDKCGIR	IPI00299116	HEK	1	0.969834	type I
PODXL	PODOCALYXIN-LIKE PROTEIN 1 PRECURSOR. [MASS=55596]	LASVPGSQTVVVK	IPI00299116	HEK	1	0.924551	type I
SDC4	SYNDECAN-4 PRECURSOR. [MASS=21642]	ESIRETEVIDPQDLLEGR	IPI00011564	HEK	5	0.96257	type I
SDC4	SYNDECAN-4 PRECURSOR. [MASS=21642]	RISPVEESEDVSN	IPI00011564	HEK	2	0.965837	type I
SDC4	SYNDECAN-4 PRECURSOR. [MASS=21642]	ETEVIDPQDLLEGR	IPI00011564	HEK	2	0.923675	type I
SDC4	SYNDECAN-4 PRECURSOR. [MASS=21642]	RISPVEESEDVSNKVSM	IPI00011564	HEK	1	1	type I
BACE1	ISOFORM A OF BETA-SECRETASE 1 PRECURSOR. [MASS=55764]	ETDEEPEEPGRR	IPI00011518	HEK	5	0.894266	type I
BACE1	ISOFORM A OF BETA-SECRETASE 1 PRECURSOR. [MASS=55764]	SIVDSGTTNLRLPK	IPI00011518	HEK	3	0.908078	type I
BACE1	ISOFORM A OF BETA-SECRETASE 1 PRECURSOR. [MASS=55764]	GSFVEMVDNLR	IPI00011518	HEK	1	0.933121	type I
BACE1	ISOFORM A OF BETA-SECRETASE 1 PRECURSOR. [MASS=55764]	SIVDSGTTNLR	IPI00011518	HEK	1	0.870681	type I
HLA	HLA CLASS I HISTOCOMPATIBILITY ANTIGEN, ALPHA CHAIN H PRECURSOR. [MASS=41236]	DGEDQTQDTELVETRPAGDGTFQK	IPI00004672	HEK	1	1	type I
HLA	HLA CLASS I HISTOCOMPATIBILITY ANTIGEN, ALPHA CHAIN H PRECURSOR. [MASS=41236]	YLENGKETLQR	IPI00004672	HEK	1	0.948859	type I
HLA	HLA CLASS I HISTOCOMPATIBILITY ANTIGEN, ALPHA CHAIN H PRECURSOR. [MASS=41236]	DGEDQTQDTELVETRPAGDGTFQK	IPI00004672	HEK	1	0.949377	type I
HLA	HLA CLASS I HISTOCOMPATIBILITY ANTIGEN, B-7 ALPHA CHAIN PRECURSOR. [MASS=40460]	APWIEQEGPEYWDR	IPI00004657	HeLa	1	0.65635	type I
HLA	HLA CLASS I HISTOCOMPATIBILITY ANTIGEN, B-73 ALPHA CHAIN PRECURSOR. [MASS=40435]	WAAVVVPSGQEQR	IPI00472943	HEK	1	0.879655	type I
HLA	HLA CLASS I HISTOCOMPATIBILITY ANTIGEN, CW-1 ALPHA CHAIN PRECURSOR. [MASS=40965]	APWVEQEGPEYWDRETQK	IPI00026650	HEK	1	1	type I
HLA	HLA CLASS I HISTOCOMPATIBILITY ANTIGEN, CW-7 ALPHA CHAIN PRECURSOR. [MASS=40649]	MSGCDLGPDGR	IPI00642409	HEK	1	0.975076	type I
HLA	HLA CLASS I HISTOCOMPATIBILITY ANTIGEN, A-33 ALPHA CHAIN PRECURSOR. [MASS=40892]	VDLGTLR	IPI00472013	HEK	1	0.7812	type I
HLA	HLA CLASS I HISTOCOMPATIBILITY ANTIGEN, CW-18 ALPHA CHAIN PRECURSOR. [MASS=40933]	YFDTAVSRPGRGEPR	IPI00472162	HEK	1	0.996706	type I
HLA	HLA CLASS I HISTOCOMPATIBILITY ANTIGEN, CW-7 ALPHA CHAIN PRECURSOR. [MASS=40649]	MSGCDLGPDGR	IPI00642409	HEK	1	0.990282	type I
HLA	MHC CLASS I PROTEIN HLA-C HEAVY CHAIN. [MASS=40769]	AAEQLRAYLEGTCVEWLRR	IPI00642083	HEK	1	0.990952	type I
HLA	HLA CLASS I HISTOCOMPATIBILITY ANTIGEN, B-7 ALPHA CHAIN PRECURSOR. [MASS=40460]	DGEDQTQDTELVETRPAGDR	IPI00004657	HEK	4	0.875329	type I
DSG2	DESMOGLEIN 2. [MASS=122294]	GNNVEKPLELR	IPI00028931	HEK	1	0.945077	type I
PLXDC2	ISOFORM 1 OF PLEXIN DOMAIN-CONTAINING PROTEIN 2 PRECURSOR. [MASS=59583]	EITVATGGFIYTGEVVHR	IPI00044369	HEK	1	0.813451	type I
PXDC2	ISOFORM 1 OF PLEXIN DOMAIN-CONTAINING PROTEIN 2 PRECURSOR. [MASS=59583]	EIPVLVTQISSTNHPVK	IPI00044369	HeLa	5	0.769209	type I
PXDC2	ISOFORM 1 OF PLEXIN DOMAIN-CONTAINING PROTEIN 2 PRECURSOR. [MASS=59583]	HRQDWVDSGCPEESKEK	IPI00044369	HEK	4	0.845478	type I
LRRC33	LEUCINE-RICH REPEAT-CONTAINING PROTEIN 33 PRECURSOR. [MASS=76366]	DLYNTSSPREMVAQFLLVDG	IPI00329367	HeLa	1	1	type I
NEO1	ISOFORM 1 OF NEOGENIN PRECURSOR. [MASS=159959]	VVAYNKHGPGVSTPDVAVR	IPI00023814	HEK	10	0.747516	type I
PRTG	SHEN-DAN. [MASS=127076]	KDPVVLDCQAHGEVPIKVTWLK	IPI00658004	HEK	9	0.968025	type I
SEZ6L2	TYPE I TRANSMEMBRANE RECEPTOR PRECURSOR. [MASS=92455]	HLHFER	IPI00018276	HEK	19	0.923239	type I
SPINT2	KUNITZ-TYPE PROTEASE INHIBITOR 2 PRECURSOR. [MASS=28228]	SIHDFCLVSKVVGR	IPI00011662	HEK	2	0.959372	type I
TGOLN2	ISOFORM TGN51 OF TRANS-GOLGI NETWORK INTEGRAL MEMBRANE PROTEIN 2 PRECURSOR. [MASS=51007]	KDHSKPISNPSDNKELPK	IPI00012545	HEK	1	0.903205	type I
TLR9	ISOFORM 4 OF TOLL-LIKE RECEPTOR 9 PRECURSOR. [MASS=118652]	LLDSVEQDFHLEIAK	IPI00219489	HeLa	1	0.660206	type I
TMEM132A	TRANSMEMBRANE PROTEIN 132A ISOFORM B. [MASS=110110]	VPGPAEGPAEPAAEASDEAERR	IPI00301865	HEK	3	0.719239	type I
TNR21	TUMOR NECROSIS FACTOR RECEPTOR SUPERFAMILY MEMBER 21 PRECURSOR. [MASS=71845]	GTFSDVPSSVMK	IPI00004413	HEK	1	1	type I
LMAN2	VESICULAR INTEGRAL-MEMBRANE PROTEIN VIP36 PRECURSOR. [MASS=40229]	EHSLIKPYQGVGSSSMPLWDFQGSTMLTSQYVR	IPI00009950	HEK	2	0.752308	type I
BSG	ISOFORM 2 OF BASIGIN PRECURSOR. [MASS=29221]	SSEHINEGETAM	IPI00019906	HEK	1	0.780964	type I
BSG	ISOFORM 2 OF BASIGIN PRECURSOR. [MASS=29221]	SSEHINEGETAM	IPI00019906	HeLa	1	0.707857	type I
BSG	ISOFORM 2 OF BASIGIN PRECURSOR. [MASS=29221]	GGVVLKEDALPGQK	IPI00019906	HEK	1	0.94488	type I
RPTPs	ISOFORM PTPS OF RECEPTOR-TYPE TYROSINE-PROTEIN PHOSPHATASE S PRECURSOR. [MASS=217094]	TDEDVPSAPPR	IPI00289831	HEK	1	0.817349	type I
RPTPs	ISOFORM PTPS OF RECEPTOR-TYPE TYROSINE-PROTEIN PHOSPHATASE S PRECURSOR. [MASS=217094]	ITTVAHTEVGPGPESSPVVVR	IPI00289831	HEK	1	0.947059	type I
CD166	CD166 ANTIGEN PRECURSOR. [MASS=65132]	VFKQPSKPEIVSK	IPI00015102	HEK	1	1	type I
CD166	CD166 ANTIGEN PRECURSOR. [MASS=65132]	SMIASTAITVHYLDLSLNPSGEVTR	IPI00015102	HeLa	1	0.848948	type I
QSOX1	QUIESCIN Q6 ISOFORM A. [MASS=82578]	GYVHYFFGCRDCASHFEQMAAASMHR	IPI00003590	HEK	2	1	type I
QSOX1	QUIESCIN Q6 ISOFORM A. [MASS=82578]	AWRPALYLAALDCAEETNSAVCR	IPI00003590	HeLa	2	1	type I
QSOX1	QUIESCIN Q6 ISOFORM A. [MASS=82578]	VGSPNAAVLWLWSSHNRVNAR	IPI00003590	HEK	1	1	type I
CNTN1	ISOFORM 1 OF CONTACTIN-1 PRECURSOR. [MASS=113320]	VIIECKPK	IPI00029751	HEK	3	0.884186	GPI
CNTN1	ISOFORM 1 OF CONTACTIN-1 PRECURSOR. [MASS=113320]	VTVTNPDTGR	IPI00029751	HEK	1	0.863991	GPI
EFNA5	EPHRIN-A5 PRECURSOR. [MASS=26297]	VFVRPTNSCMK	IPI00005517	HEK	1	0.741403	GPI
EFNA5	EPHRIN-A5 PRECURSOR. [MASS=26297]	YVLYMVNFDGYSACDHTSK	IPI00005517	HeLa	1	0.684622	GPI
GPC3	GLYPICAN-3 PRECURSOR. [MASS=65563]	VAHVEHEETLSSR	IPI00019907	HEK	1	0.782174	GPI
GPC3	GLYPICAN-3 PRECURSOR. [MASS=65563]	VAHVEHEETLSSR	IPI00019907	HEK	1	0.712476	GPI
GOLIM4	GOLGI PHOSPHOPROTEIN 4. [MASS=81880]	LAVQQVEEAQQLREHQEALHQQR	IPI00004962	HEK	4	0.851294	type II
GOLIM4	GOLGI PHOSPHOPROTEIN 4. [MASS=81880]	LAVQQVEEAQQLR	IPI00004962	HEK	1	0.985166	type II
